# Supplementary material
Source: PubMed Central journal article supplement (PMC7655397)
Supplement: 18-00725.pdf [file 18-00725.pdf]

**On-line Table 1: Patient characteristics<sup>a</sup>**

|                                                           | Hemorrhagic Transformation (n = 8) | Contrast Staining (n = 9) | Total (n = 17)   | P     |
|-----------------------------------------------------------|------------------------------------|---------------------------|------------------|-------|
| Sex                                                       |                                    |                           |                  | .091  |
| Male                                                      | 6 (75.00%)                         | 2 (22.22%)                | 8 (47.06%)       |       |
| Female                                                    | 2 (25.00%)                         | 7 (77.78%)                | 9 (52.94%)       |       |
| Mean age (yr)                                             | 68.38 ± 8.73                       | 75.22 ± 12.11             | 72.00 ± 10.91    | .206  |
| Atrial fibrillation                                       | 4 (50.00%)                         | 4 (44.44%)                | 8 (47.06%)       | 1.000 |
| High blood pressure                                       | 4 (50.00%)                         | 7 (77.78%)                | 11 (64.71%)      | .492  |
| Diabetes mellitus                                         | 2 (25.00%)                         | 2 (22.22%)                | 4 (23.53%)       | 1.000 |
| Dyslipidemia                                              | 0 (0.0%)                           | 1 (11.11%)                | 1 (5.88%)        | 1.000 |
| Intravenous therapy                                       | 6 (75.00%)                         | 8 (88.89%)                | 14 (82.35%)      | .910  |
| Recanalization, TIC1 score                                |                                    |                           |                  | .250  |
| 0                                                         | 0 (0.0%)                           | 2 (22.22%)                | 2 (11.76%)       |       |
| 1                                                         | 0 (0.0%)                           | 1 (11.11%)                | 1 (5.88%)        |       |
| 2a                                                        | 0 (0.0%)                           | 0 (0.0%)                  | 0 (0.0%)         |       |
| 2b                                                        | 1 (12.50%)                         | 2 (22.22%)                | 3 (17.65%)       |       |
| 3                                                         | 7 (87.50%)                         | 4 (44.44%)                | 11 (64.71%)      |       |
| Time from symptom onset to revascularization (mean) (min) | 284.75 ± 42.16                     | 288.38 ± 44.41            | 286.56 ± 41.87   | .869  |
| NIHSS score, pretreatment                                 | 16.0 [12.5–18.5]                   | 16.0 [15.0–17.0]          | 16.0 [15.0–18.0] | .846  |
| NIHSS score, discharge                                    | 4.0 [3.0–13.0]                     | 8.0 [4.0–14.0]            | 5.0 [4.0–14.0]   | .407  |
| Median mRS score, pretreatment                            | 0.0 [0.0–0.5]                      | 0.0 [0.0–1.0]             | 0.0 [0.0–1.0]    | .811  |
| Median mRS score, discharge                               | 5.0 [3.5–5.0]                      | 4.0 [3.0–5.0]             | 4.0 [3.0–5.0]    | .471  |
| Median mRS score, 90 days                                 | 3.0 [2.5–3.5] <sup>b</sup>         | 3.0 [2.0–3.0]             | 3.0 [2.0–3.0]    | .940  |
| Hemorrhagic transformation                                | 8 (100.00%)                        | 0 (0.00%)                 | 8 (47.06%)       | .001  |
| HI type 1                                                 | 0 (0.00%)                          | 0 (0.00%)                 | 0 (0.00%)        |       |
| HI type 2                                                 | 5 (62.50%)                         | 0 (0.00%)                 | 5 (29.41%)       |       |
| PH type 1                                                 | 1 (12.50%)                         | 0 (0.00%)                 | 1 (5.88%)        |       |
| PH type 2                                                 | 2 (25.00%)                         | 0 (0.00%)                 | 2 (11.76%)       |       |
| Symptomatic ICH                                           | 1 (12.50%)                         | 0 (0.00%)                 | 1 (5.88%)        | .952  |

**Note:**—ICH indicates intracerebral hemorrhage; HI, hemorrhagic infarction according to the ECASS criteria; PH, parenchymal hematoma according to the ECASS criteria.

<sup>a</sup> Values are numbers of patients with percentages in parentheses for categoric variables and mean ± SD for continuous variables. Numbers in brackets are interquartile range.

<sup>b</sup> Seven patients were analyzed for the final study (with the loss of 1 patient during the follow-up).

**On-line Table 2: Outcomes of contrast staining on last imaging study**

| Outcome                    | No. | Percentage (%) |
|----------------------------|-----|----------------|
| Infarction                 | 7   | 77.78          |
| Return to normal structure | 2   | 22.22          |

| Concentration of contrast (M, I mole/L) | 0 M     | 0.1 M   | 0.4 M   | 0.6 M   | 1.2 M   | 2 M     | 2.4 M   |
|-----------------------------------------|---------|---------|---------|---------|---------|---------|---------|
| Visipaque (Iodixanol, 320 I mg/ml)      |         |         |         |         |         |         |         |
| Omnipaque (Iohexol, 350 I mg/ml)        |         |         |         |         |         |         |         |
| Xenetics (Iobitridol, 300 I mg/ml)      |         |         |         |         |         |         |         |
| Iomeron (Iomeprol, 300 I mg/ml)         |         |         |         |         |         |         |         |
| Pamiray (Iopamidol, 300 I mg/ml)        |         |         |         |         |         |         |         |
|                                         | 3425.17 | 3205.13 | 2994.01 | 2457.00 | 1751.31 | 1074.11 | 819.00  |
|                                         | 3875.55 | 3610.11 | 3745.32 | 2512.56 | 2155.17 | 1488.10 | 985.22  |
|                                         | 3959.64 | 3703.70 | 3558.72 | 2702.70 | 2092.05 | 1262.63 | 965.25  |
|                                         | 4200.46 | 3636.36 | 3472.22 | 2557.54 | 2247.19 | 1562.50 | 1144.16 |
|                                         | 3852.59 | 3460.21 | 2645.50 | 2352.94 | 1879.70 | 1345.90 | 1039.50 |

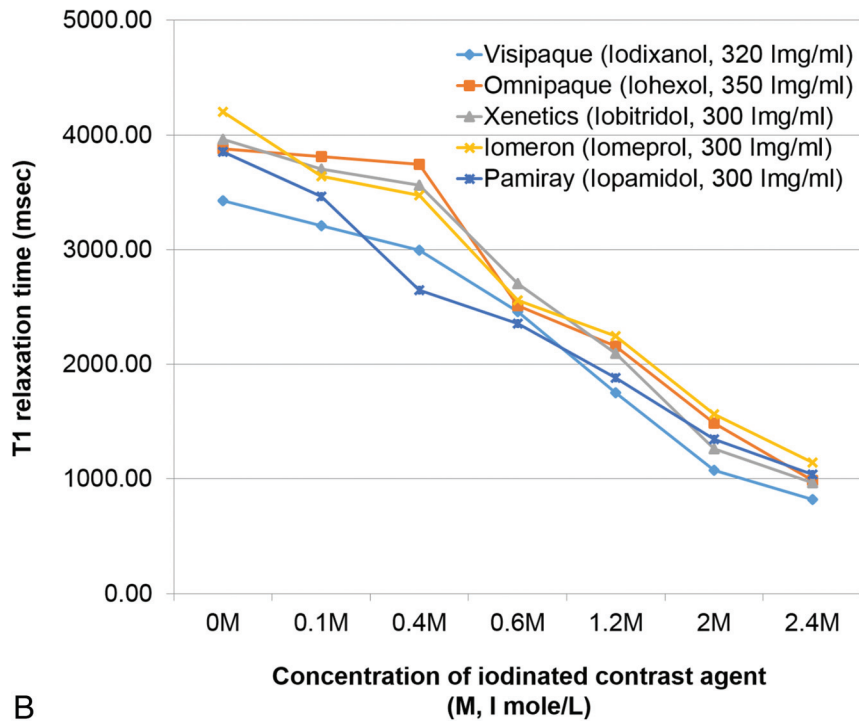

**ON-LINE FIG 1.** MR signal intensities of 5 different kinds of iodinated contrast agents on T1-weighted imaging. A, Images from the phantom. B, T1-relaxation times of 5 different kinds of iodinated contrast agents at different concentrations.

| Concentration of contrast (M, I mole/L) | 0M      | 0.1M   | 0.4M   | 0.6M   | 1.2M   | 2M     | 2.4M  |
|-----------------------------------------|---------|--------|--------|--------|--------|--------|-------|
| Visipaque (Iodixanol, 320 I mg/ml)      |         |        |        |        |        |        |       |
|                                         | 1639.42 | 929.53 | 459.64 | 343.18 | 169.95 | 95.79  | 75.32 |
| Omnipaque (Iohexol, 350 I mg/ml)        |         |        |        |        |        |        |       |
|                                         | 1913.25 | 878.20 | 422.70 | 292.39 | 199.01 | 114.48 | 78.24 |
| Xenetics (Iobitridol, 300 I mg/ml)      |         |        |        |        |        |        |       |
|                                         | 1812.03 | 770.09 | 303.01 | 277.85 | 151.92 | 58.71  | 52.77 |
| Iomeron (Iomeprol, 300 I mg/ml)         |         |        |        |        |        |        |       |
|                                         | 1171.65 | 941.85 | 390.16 | 346.06 | 217.79 | 105.29 | 78.45 |
| Pamiray (Iopamidol, 300 I mg/ml)        |         |        |        |        |        |        |       |
|                                         | 1030.54 | 703.65 | 441.29 | 314.57 | 118.44 | 66.00  | 66.82 |

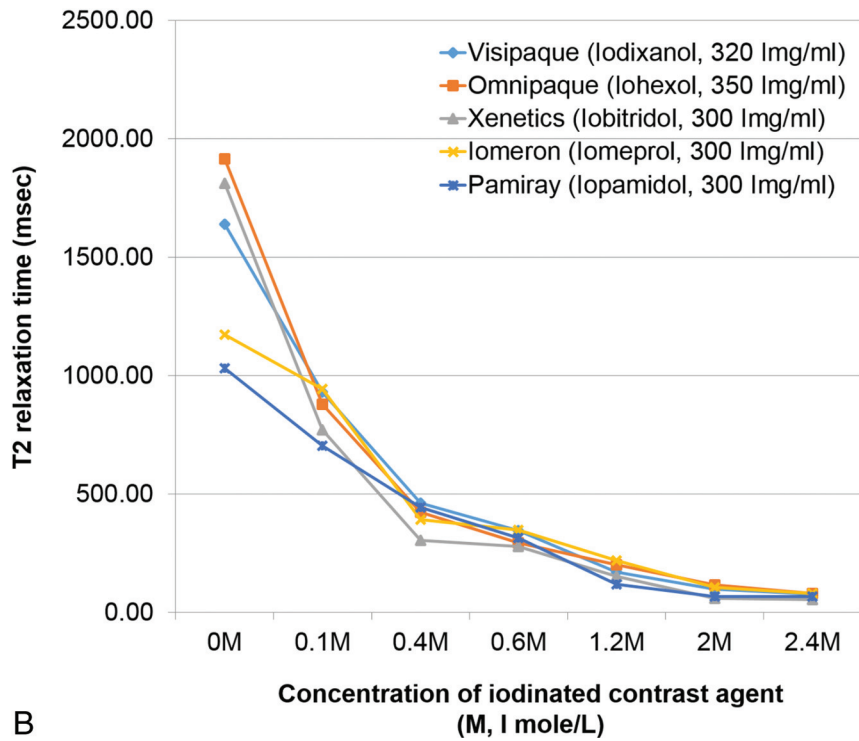

**ON-LINE FIG 2.** MR signal intensities of 5 different kinds of iodinated contrast agents on T2-weighted imaging. A, Images from the phantom. B, T2-relaxation times of 5 different kinds of iodinated contrast agents at different concentrations.

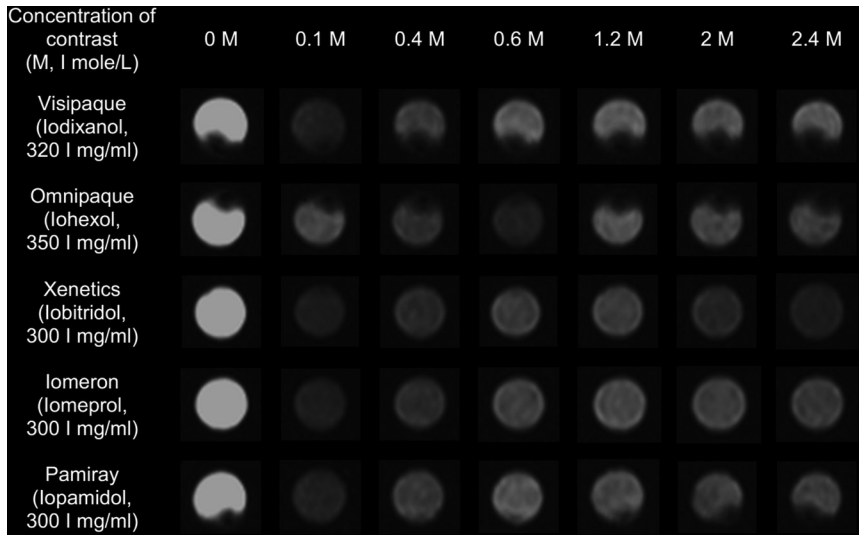

**ON-LINE FIG 3.** MR signal intensities of 5 different kinds of iodinated contrast agents on gradient recalled-echo imaging.
